# Supplementary material for: Assessment of mitochondrial genomes for heterobranch gastropod phylogenetics
Source: PubMed Central journal article supplement (PMC7853304; doi:10.1186/s12862-020-01728-y), 2021-01-21

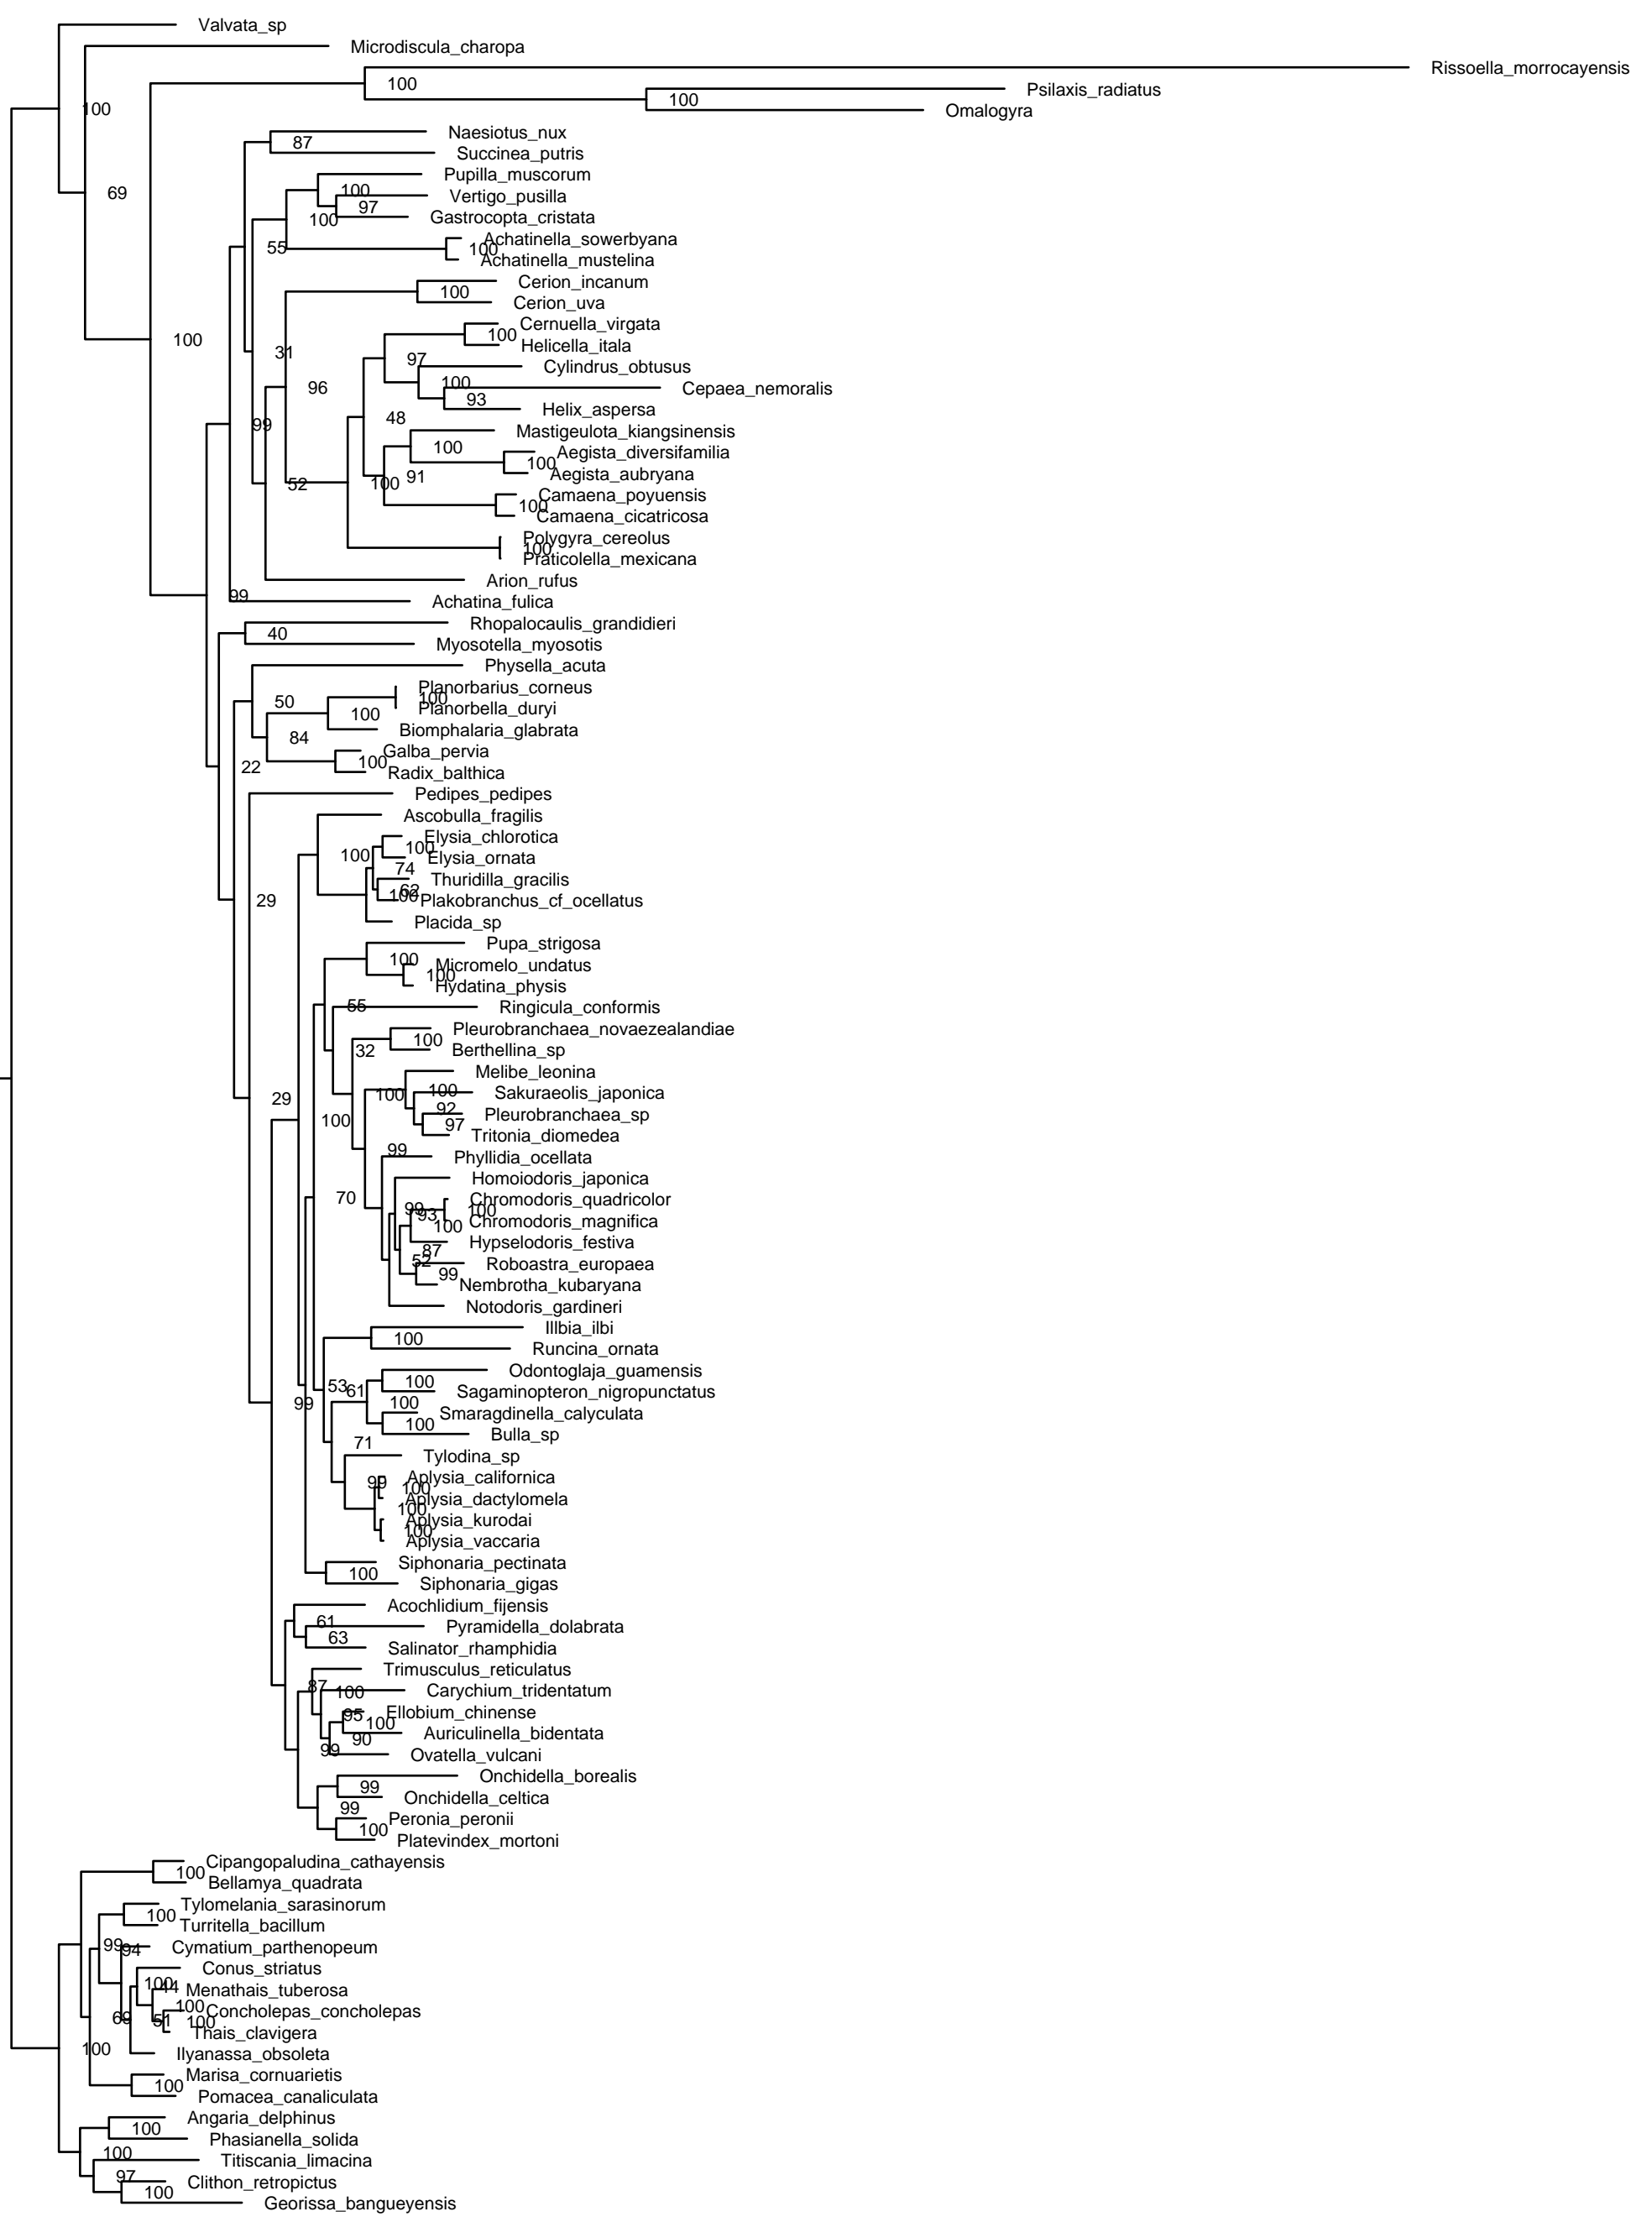

Supplement: 12862_2020_1728_MOESM7_ESM.pdf [file 12862_2020_1728_MOESM7_ESM.pdf]
